# Supplementary material
Source: PubMed Central journal article supplement (PMC4148799)
Supplement: AEM.00649-14_zam999105521so1.pdf [file AEM.00649-14_zam999105521so1.pdf]

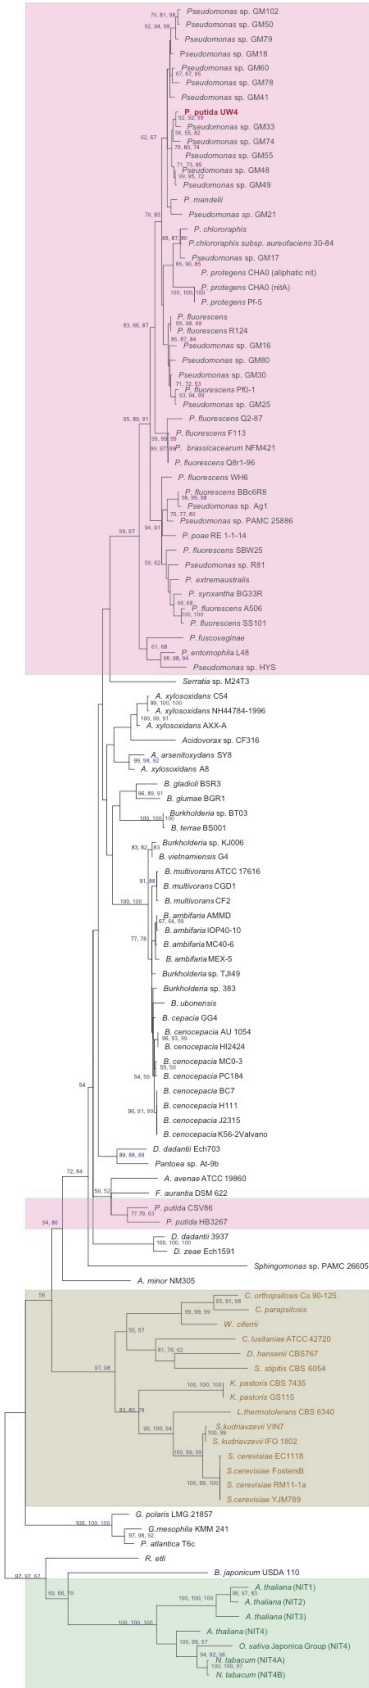

Figure A1. Nitrilase phylogeny inferred using Maximum-likelihood method. The results of a ML-bootstrap analysis are shown in black, whereas the values in blue and purple are from neighbour-joining and maximum parsimony bootstrap analysis respectively. Plants are shown in green, yeasts in brown and pseudomonads in pink boxes.

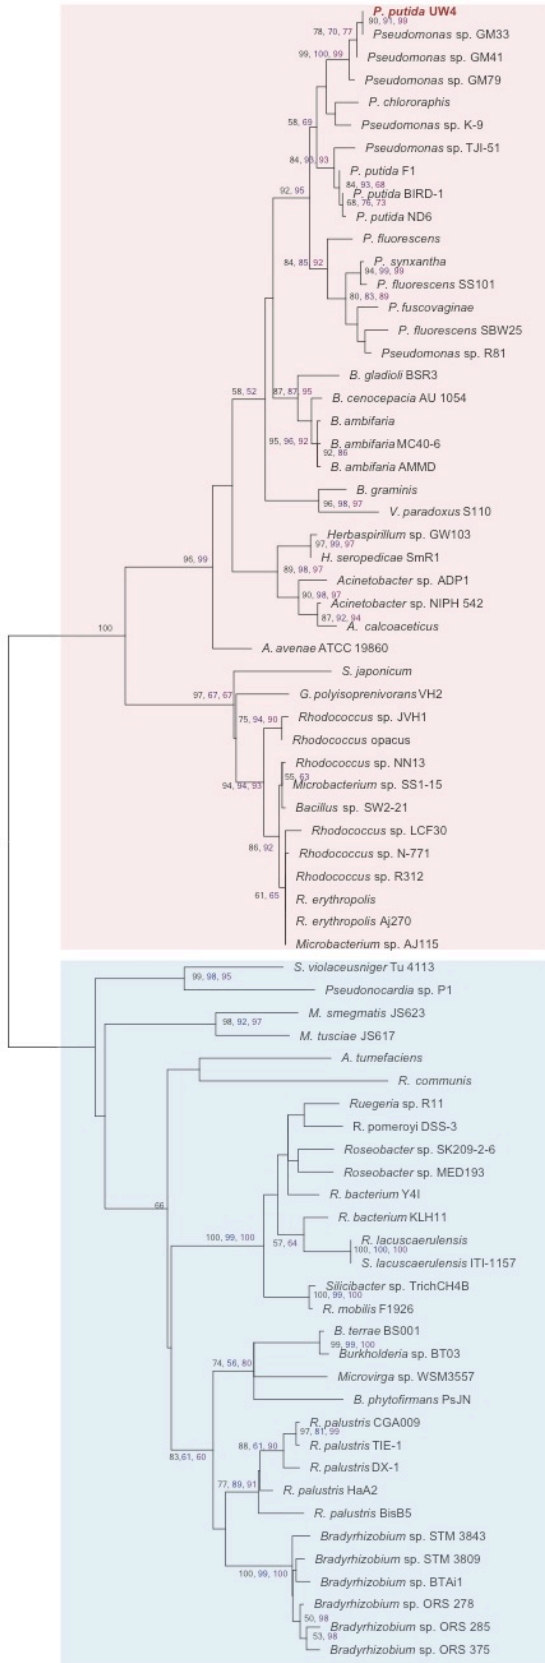

Figure A2. Nitrile hydratase  $\alpha$ -subunit phylogeny inferred using ML method. The results of a ML-bootstrap analysis are shown in black, whereas the values in blue and purple are from neighbour-joining and maximum parsimony bootstrap analysis respectively. Iron-type nitrile hydratases are shown in red and cobalt-type in blue boxes

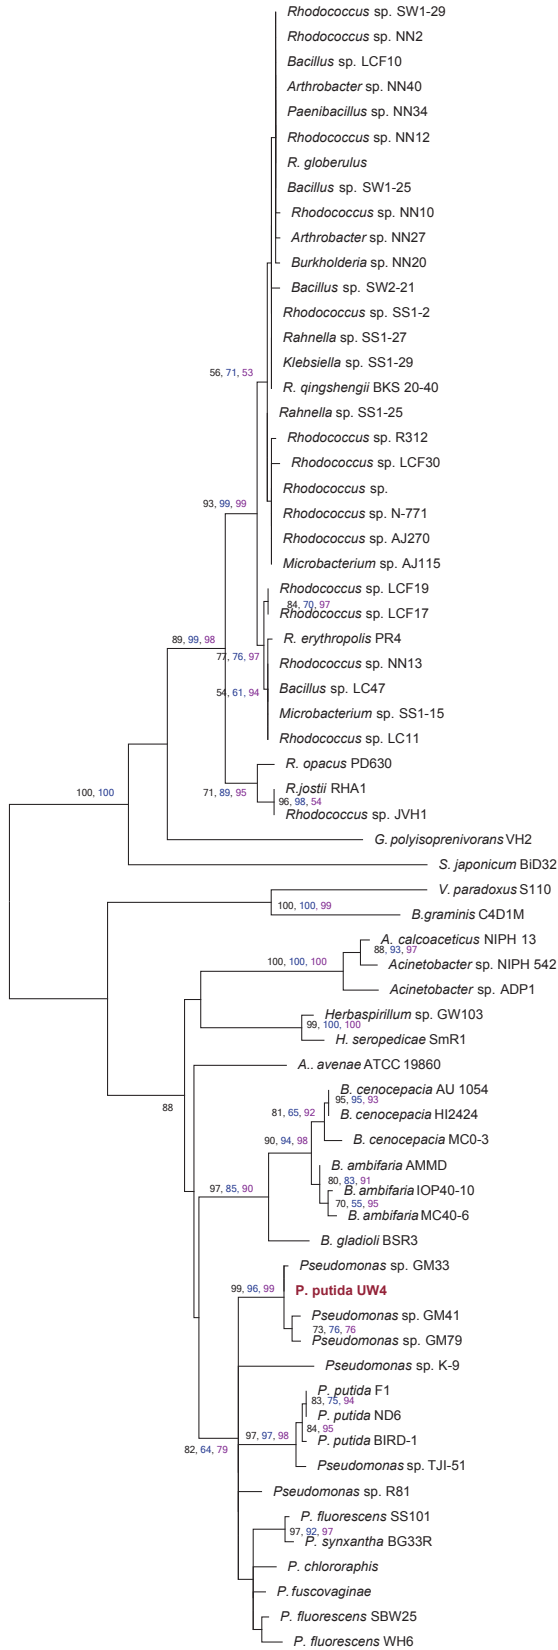

Figure A3. Nitrile hydratase  $\beta$ -subunit phylogeny inferred using ML method. The results of a ML-bootstrap analysis are shown in black, whereas the values in blue and purple are from neighbour-joining and maximum parsimony bootstrap analysis respectively.

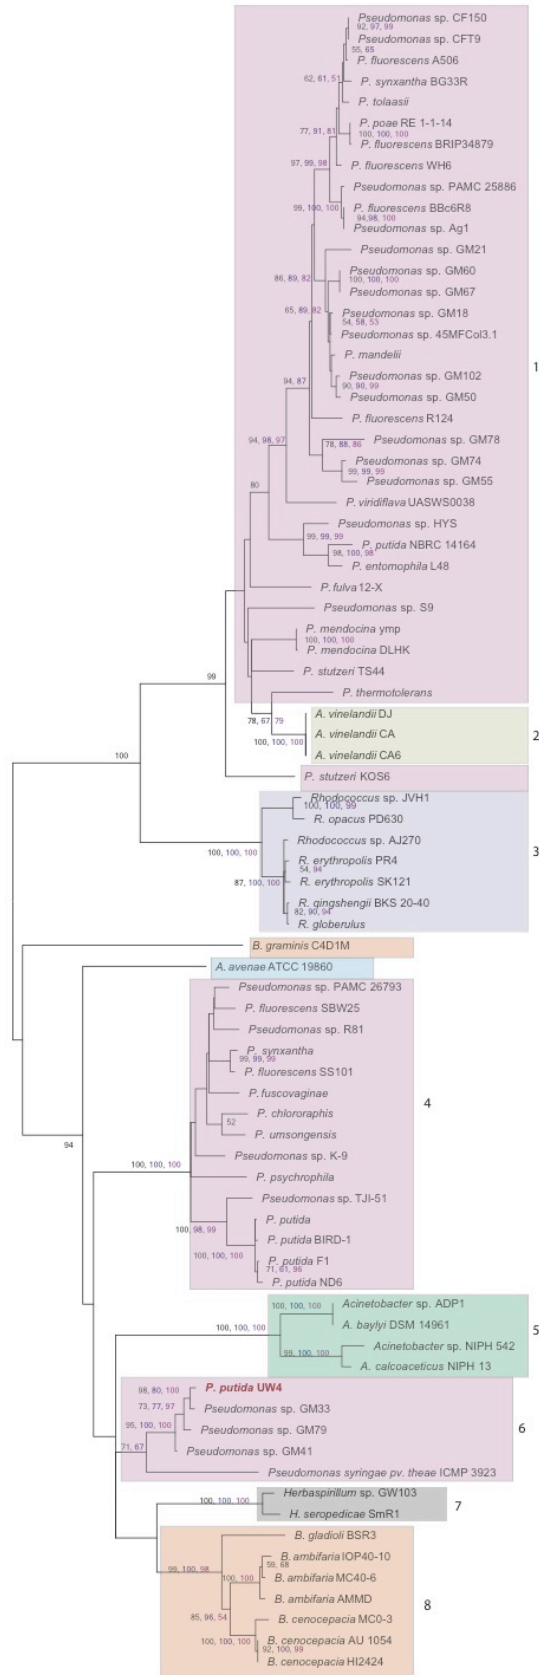

1

2

3

4

5

6

7

8

Figure A4. P47K activator protein phylogeny inferred using the ML method. The results of a ML-bootstrap analysis are shown in black, whereas the values in blue and purple are from neighbor-joining and maximum parsimony bootstrap analysis respectively. Each bacterial species is represented by a different coloured box and clusters are numbered.
